# Supplementary material for: Large terrestrial mammals resurging in a depopulating country
Source: Research Square preprint supplement (doi:10.21203/rs.3.rs-4937471/v1), 2024-09-24
Supplement: Supplementary file 1 [file 2fd357c68f198ca721e009fd.docx]

| Factor | Rationale | Expected Impact |
| --- | --- | --- |
| Land cover | Forests serve as natural habitat with food resources for large terrestrial mammals1,2. | Large terrestrial mammals are more likely to expand into areas with more forest cover. |
| Agricultural lands provide attractive food resources (i.e., crops) to large terrestrial mammals2,3. However, human activities in these landscape can deter these species4,5. | Large terrestrial mammals are more likely to expand into areas with less agricultural land cover or areas with more agricultural land cover. |
| Terrain ruggedness | Highly rugged terrain restricts movement for some species6, while it can serve as a refuge due to reduced human accessibility7,8. | The range expansion of large terrestrial mammals mainly occurs along more rugged areas or less rugged areas. |
| Snow cover | Snow limits food availability and movement for large terrestrial mammals9–11. | Reduced snow depth facilitates the expansion of large terrestrial mammals into new areas. |
| Human activity | Human activity generally restricts habitat availability and movement for large terrestrial mammals12,13. | Large terrestrial mammals extend their range to areas with less human activity. |
| Agricultural abandonment | Agricultural abandonment can lead to reduced human disturbance and provide re-naturalized habitat14. | Abandoned agricultural lands facilitate the expansion of large terrestrial mammals into new areas. |
| Propagule pressure | Both the abundance of the same species in a given area and the proximity to its original range can influence the likelihood of colonization of new areas1,2. | The presence of the same species near unoccupied areas may increase the potential for expansion into these areas. |

Table 1. Rationale and expected impacts of different factors on the range expansion of large terrestrial mammals.

**References**

1. Morelle, K., Fattebert, J., Mengal, C. & Lejeune, P. Invading or recolonizing? Patterns and drivers of wild boar population expansion into Belgian agroecosystems. *Agriculture, Ecosystems & Environment* **222**, 267–275 (2016).

2. Carvalho, J. *et al.* Propagule pressure and land cover changes as main drivers of red and roe deer expansion in mainland Portugal. *Diversity and Distributions* **24**, 551–564 (2018).

3. Laforge, M. P., Michel, N. L. & Brook, R. K. Spatio-temporal trends in crop damage inform recent climate-mediated expansion of a large boreal herbivore into an agro-ecosystem. *Sci Rep* **7**, 15203 (2017).

4. Tsunoda, H. & Enari, H. A strategy for wildlife management in depopulating rural areas of Japan. *Conservation Biology* **34**, 819–828 (2020).

5. Ditmer, M. A., Garshelis, D. L., Noyce, K. V., Haveles, A. W. & Fieberg, J. R. Are American black bears in an agricultural landscape being sustained by crops? *Journal of Mammalogy* **97**, 54–67 (2016).

6. Pérez-Espona, S. *et al.* Landscape features affect gene flow of Scottish Highland red deer (Cervus elaphus). *Molecular Ecology* **17**, 981–996 (2008).

7. Nellemann, C. *et al.* Terrain use by an expanding brown bear population in relation to age, recreational resorts and human settlements. *Biological conservation* **138**, 157–165 (2007).

8. Ahmadi, M., López-Bao, J. V. & Kaboli, M. Spatial Heterogeneity in Human Activities Favors the Persistence of Wolves in Agroecosystems. *PLOS ONE* **9**, e108080 (2014).

9. Markov, N. I. Population dynamics of wild boar, Sus scrofa, in Sverdlovsk oblast and its relation to climatic factors. *Russian Journal of Ecology* **28**, 269–274 (1997).

10. Kennedy-Slaney, L., Bowman, J., Walpole, A. A. & Pond, B. A. Northward bound: the distribution of white-tailed deer in Ontario under a changing climate. *Wildl. Res.* **45**, 220–228 (2018).

11. Yovovich, V. *et al.* Determining puma habitat suitability in the Eastern USA. *Biodivers Conserv* **32**, 921–941 (2023).

12. Tucker, M. A. *et al.* Moving in the Anthropocene: Global reductions in terrestrial mammalian movements. *Science* **359**, 466–469 (2018).

13. Suraci, J. P. *et al.* Disturbance type and species life history predict mammal responses to humans. *Global Change Biology* **27**, 3718–3731 (2021).

14. Boitani, L. & Linnell, J. D. C. Bringing Large Mammals Back: Large Carnivores in Europe. in *Rewilding European Landscapes* (eds. Pereira, H. M. & Navarro, L. M.) 67–84 (Springer International Publishing, Cham, 2015). doi:10.1007/978-3-319-12039-3_4.
