# Supplementary material for: Large terrestrial mammals resurging in a depopulating country
Source: Research Square preprint supplement (doi:10.21203/rs.3.rs-4937471/v1), 2024-09-24
Supplement: Supplementary file 2 [file 31df18ba429c49d65a6c8edb.docx]

Table 2. Coefficient estimates for range expansion analysis of six large mammal species (a: sika deer in Honshu, Kyushu, and Shikoku; b: wild boar; c: Asiatic black bear; d: Japanese serow; e: Japanese macaque; f: sika deer in Hokkaido; and g: brown bear) in 1978–2003, and after 2003 (2003–2014 for sika deer and wild boar; 2003–2017 for Asiatic black bear, Japanese serow, Japanese macaque and brown bear) in Japan. β the coefficient estimates, LCI the lower confidence interval, and UCI the upper confidence interval.

| Species | Period |  | Variable | | | | | | Concordance |
| --- | --- | --- | --- | --- | --- | --- | --- | --- | --- |
|  | Artificial light at night | Area of  agricultural land | Area of abandoned agricultural land | Maximum snow depth | Terrain ruggedness index | Number of adjacent cells occupied |
| Sika deer in Honshu, Kyushu, and Shikoku | 1978–2003 | β | -0.149 | -0.059 | 0.014 | -0.249 | -0.023 | 1.780 | 0.719 |
| LCI | -0.291 | -0.198 | -0.120 | -0.500 | -0.187 | 1.609 |
| UCI | -0.007 | 0.080 | 0.149 | 0.003 | 0.141 | 1.951 |
| 2003–2014 | β | -0.324 | -0.292 | 0.056 | -0.760 | 0.177 | 1.324 | 0.686 |
| LCI | -0.449 | -0.422 | -0.067 | -0.995 | 0.012 | 1.185 |
| UCI | -0.199 | -0.161 | 0.180 | -0.524 | 0.342 | 1.464 |
| Wild boar | 1978–2003 | β | -0.259 | -0.389 | 0.380 | -0.021 | -0.067 | 1.958 | 0.729 |
| LCI | -0.453 | -0.573 | 0.207 | -0.358 | -0.310 | 1.733 |
| UCI | -0.065 | -0.205 | 0.553 | 0.317 | 0.176 | 2.183 |
| 2003–2014 | β | -0.733 | -0.507 | 0.343 | -0.727 | -0.199 | 1.342 | 0.699 |
| LCI | -0.919 | -0.687 | 0.148 | -1.065 | -0.454 | 1.154 |
| UCI | -0.547 | -0.326 | 0.538 | -0.389 | 0.057 | 1.529 |
| Asiatic black bear | 1978–2003 | β | -0.191 | -0.411 | 0.294 | -1.067 | 0.029 | 1.697 | 0.734 |
| LCI | -0.348 | -0.581 | 0.148 | -1.376 | -0.169 | 1.533 |
| UCI | -0.034 | -0.240 | 0.441 | -0.758 | 0.227 | 1.860 |
| 2003–2017 | β | -0.232 | -0.474 | 0.172 | -1.068 | 0.013 | 1.665 | 0.683 |
| LCI | -0.356 | -0.659 | 0.018 | -1.452 | -0.190 | 1.475 |
| UCI | -0.107 | -0.288 | 0.326 | -0.684 | 0.217 | 1.856 |
| Japanese serow | 1978–2003 | β | -0.348 | -0.576 | 0.182 | -0.842 | 0.003 | 1.313 | 0.743 |
| LCI | -0.495 | -0.740 | 0.038 | -1.109 | -0.218 | 1.160 |
| UCI | -0.201 | -0.413 | 0.326 | -0.574 | 0.224 | 1.466 |
| 2003–2017 | β | -0.264 | -0.325 | -0.006 | -1.220 | 0.258 | 1.942 | 0.779 |
| LCI | -0.443 | -0.563 | -0.191 | -1.664 | -0.040 | 1.699 |
| UCI | -0.085 | -0.088 | 0.180 | -0.777 | 0.556 | 2.186 |
| Japanese macaque | 1978–2003 | β | -0.078 | -0.224 | 0.130 | -0.877 | -0.404 | 1.099 | 0.689 |
| LCI | -0.196 | -0.348 | 0.015 | -1.119 | -0.539 | 0.994 |
| UCI | 0.039 | -0.100 | 0.244 | -0.635 | -0.268 | 1.203 |
| 2003–2017 | β | -0.357 | -0.234 | 0.157 | -0.909 | 0.080 | 2.136 | 0.813 |
| LCI | -0.533 | -0.393 | 0.002 | -1.245 | -0.111 | 1.969 |
| UCI | -0.182 | -0.076 | 0.312 | -0.573 | 0.271 | 2.304 |
| Sika deer in Hokkaido | 1978–2003 | β | -0.262 | -0.460 | 0.047 | -1.246 | 0.554 | 2.287 | 0.772 |
| LCI | -0.514 | -0.801 | -0.134 | -1.704 | 0.137 | 1.812 |
| UCI | -0.009 | -0.118 | 0.227 | -0.788 | 0.970 | 2.763 |
| 2003–2014 | β | 0.273 | -0.497 | -0.123 | -2.007 | -0.066 | 0.638 | 0.749 |
| LCI | -0.431 | -1.023 | -0.433 | -2.703 | -0.595 | 0.319 |
| UCI | 0.976 | 0.029 | 0.187 | -1.310 | 0.463 | 0.956 |
| Brown bear | 1978–2003 | β | 0.117 | 0.200 | -0.214 | -0.225 | -0.157 | 1.256 | 0.686 |
| LCI | -0.032 | 0.050 | -0.339 | -0.503 | -0.378 | 1.103 |
| UCI | 0.267 | 0.351 | -0.089 | 0.053 | 0.064 | 1.409 |
| 2003–2017 | β | 0.095 | -0.065 | -0.110 | -1.316 | 0.147 | 1.587 | 0.744 |
| LCI | -0.064 | -0.261 | -0.243 | -1.718 | -0.166 | 1.388 |
| UCI | 0.254 | 0.131 | 0.022 | -0.915 | 0.459 | 1.785 |
